1 **Title:**

2 The potyviral protein 6K1 reduces plant protease activity during *Turnip mosaic virus*  
3 infection

4

5 Sayanta Bera<sup>1^</sup>, Gabriella D. Arena<sup>2</sup>, Swayamjit Ray<sup>1</sup>, Sydney Flannigan<sup>1</sup>, Clare L  
6 Casteel<sup>1\*</sup>

7

8

9 <sup>1</sup>Department of Plant-Microbe Biology and Plant Pathology, Cornell University,  
10 Ithaca, NY, 14850 USA

11 <sup>2</sup>Laboratório de Biologia Molecular Aplicada, Instituto Biológico de São Paulo, São  
12 Paulo, SP, Brazil

13

14

15

16

17 Correspondence:

18 \*Clare L. Casteel, [ccasteel@cornell.edu](mailto:ccasteel@cornell.edu)

19

20 <sup>^</sup>Present address: Department of Cell Biology and Molecular Genetics, University of  
21 Maryland College Park, College Park, MD 20742, USA; [sbera@umd.edu](mailto:sbera@umd.edu)

22

23

24

25

26

27

## 28 SUMMARY

- 29 • Potyviral genomes encode just 11 major proteins and multifunctionality is  
30 associated to most of these proteins at different stages of virus life cycle. The  
31 potyviral protein 6K1 is required for potyvirus replication at the early stages of  
32 viral infection and may mediate cell-to-cell movement at later stages.
- 33 • Our study demonstrates that the 6K1 protein from *Turnip mosaic virus* (TuMV)  
34 reduces the abundance of transcripts related to jasmonic acid biosynthesis and  
35 transcripts that encode cysteine protease inhibitors when expressed in *trans* in  
36 *Nicotiana benthamiana* relative to controls. Furthermore, 6K1 stability  
37 increases when lipoxygenase and cysteine protease activity is inhibited  
38 chemically, linking a mechanism to the rapid turnover of 6K1 when expressed  
39 in *trans*.
- 40 • Using transient expression, we show 6K1 is degraded rapidly at early time  
41 points in the infection process, whereas at later stages of infection protease  
42 activity is reduced and 6K1 becomes more stable, resulting in higher TuMV  
43 accumulation in systemic leaves. There was no impact of 6K1 transient  
44 expression on TuMV accumulation in local leaves.
- 45 • Together, these results suggest a novel function for the TuMV 6K1 protein  
46 which has not been reported previously and enhances our understanding of the  
47 complex interactions occurring between plants and potyviruses.

48

49 **Keywords:** *Arabidopsis thaliana*, defence, jasmonic acid, MPMI, papain-like cysteine  
50 proteases, phytohormones, plant-microbe interactions, plant-virus interaction, protein  
51 turnover, transcriptomics, *Turnip mosaic virus*.

## 52 INTRODUCTIONS

53

54 Viruses have evolved to perform all of the essential functions required to successfully  
55 infect a host, despite their very small genomes. At least two genetic strategies are  
56 observed that allow viruses to be more efficient with their limited coding potential  
57 (Elena *et al.*, 2014). One of the strategies is to code for proteins from overlapping open  
58 reading frames (ORF) present in the viral genome (Schlub and Holmes, 2020). The  
59 overlapping ORFs strategy includes the presence of subgenomic RNA and a  
60 frameshift of the starting codon of an ORF (Schlub and Holmes, 2020). Another  
61 strategy is the multifunctionality of the viral encoded proteins (Callaway *et al.*, 2001;  
62 Valli *et al.*, 2018). Some viral proteins are known to perform multiple critical functions  
63 in the virus life cycle, such as genome replication, encapsidation, intercellular  
64 movement, long-distance movement, RNA silencing suppression, or vector  
65 transmission (Deng *et al.*, 2015; May *et al.*, 2020; Valli *et al.*, 2018). These above-  
66 mentioned strategies are not mutually exclusive and help viruses to circumvent the  
67 problem of small genome size.

68

69 The multifunctionality of viral proteins can be regulated spatially and temporally, and  
70 is dependent on ecological conditions and stages of the viral life cycle. A study on the  
71 viral protein nuclear inclusion a protease (NIaPro) demonstrated that apart from the  
72 proteolytic activity, it also has a role in plant-aphid interactions by re-localizing outside  
73 of the nucleus of a plant cell when the aphid vector is present (Bak *et al.*, 2017). Thus,  
74 Bak *et al.*, (2017) demonstrates the role of ecological interactions in modulating the  
75 location and function of potyviral proteins. Post-translational modification of viral  
76 proteins can also be used to change their physio-chemical properties, such as stability.  
77 For example, the coat protein (CP) of *Potato virus A* is degraded rapidly at early time

78 points in the infection process, whereas at later stages the CP becomes more stable,  
79 when systemic infection and encapsidation are critical (Ivanov *et al.*, 2003). It was  
80 determined that phosphorylation of the CP was responsible for the dynamic stability  
81 of CP, correlating with the viral life cycle (Ivanov *et al.*, 2003). Another way to regulate  
82 viral protein stability is by interfering with the host's degradation machinery. For  
83 example, proteins encoded from the genomes of *Cucumber mosaic virus* (CMV),  
84 *Cauliflower mosaic virus* (CaMV), *Barley stripe mosaic virus* (BSMV), *Tomato yellow*  
85 *leaf curl virus* (TYLCV), *Cotton leaf curl Multan virus* (CLCuMuV), and *Turnip mosaic*  
86 *virus* (TuMV) are known to interact with proteins in the autophagy or the ubiquitin-  
87 proteasome degradation pathway, affecting viral protein turnover (Cheng and Wang,  
88 2017; Hafrén *et al.*, 2017; Hafrén *et al.*, 2018; Ismayil *et al.*, 2019; Li *et al.*, 2018; Yang  
89 *et al.*, 2018).

90

91 Potyviruses have single-stranded positive-sense RNA genomes which  
92 characteristically contain one ORF. The single ORF encodes a large polyprotein that  
93 is cleaved into 10 functional proteins by virus-encoded proteases (García *et al.*, 1992;  
94 Revers and García, 2015). Some potyviruses contain another small overlapping ORF  
95 which codes the PIPO protein and is located within the P3 cistron of the polyprotein  
96 (Chung *et al.*, 2008). While each potyviral proteins is known to perform multiple  
97 functions, not much is known on the function of the 6K1 protein, a small 6 kDa protein.  
98 Early research suggested 6K1 may play a role in viral replication and in cell-to-cell  
99 movement (Hong *et al.*, 2007; Johansen *et al.*, 2001), however research related to  
100 6K1 has been limited over the past two decades due to its small size, instability due  
101 to high protein turnover, and low protein expression levels (Cui and Wang, 2016; Geng  
102 *et al.*, 2017; Kekarainen *et al.*, 2002; Merits *et al.*, 2002; Waltermann and Maiss, 2006).

103 Despite these challenges, Cui and Wang, (2016) presented evidence that 6K1 is  
104 required during the early stages of *Plum pox virus* (PPV) replication and recently a  
105 study demonstrated that the 6K2 protein, which is considered as a marker for viral  
106 replication complex (VRC), recruits 6K1 to the potyvirus replication complex (Geng *et*  
107 *al.*, 2017), confirming earlier findings. Surprisingly, the 6K1 protein, which also  
108 contains a hydrophobic transmembrane domain like the 6K2 protein, is found in the  
109 soluble protein fraction, while 6K2 is found in membrane fraction (Cui and Wang, 2016;  
110 Jiang *et al.*, 2015).

111

112 Although using a mutated infectious clone simulates the natural viral infection process,  
113 in the case of 6K1 mutations are lethal for virus survival (Cui and Wang, 2016;  
114 Kekarainen *et al.*, 2002; Merits *et al.*, 2002). The goal of this study was to further our  
115 understanding of 6K1's function using a model system consisting of the potyvirus  
116 TuMV and *Nicotiana benthamiana* as a host. To circumvent the difficulty of no or  
117 reduced viral infection from mutating 6K1 in an infectious clone, we assayed the  
118 function of 6K1 by ectopically expressing it in uninfected plants and in the presence of  
119 a wildtype TuMV infection. This strategy allowed us to investigate in detail additional  
120 functions associated with the 6K1 protein during the virus life cycle and circumvent  
121 issues with 6K1 protein stability. Our results suggest jasmonic acid and papain-like  
122 cysteine proteases may play a role in changes in 6K1 stability and function during the  
123 infection process. Understanding the molecular mechanism behind the 6K1 protein  
124 degradation will also pave the way for future studies on the critical multifunctionality  
125 associated with viral proteins and successful viral infection in plants.

126

127 **RESULTS**

128

129 **The ectopically expressed 6K1 protein is degraded by cysteine proteases.**

130 We first examined stability of 6K1 using our construct, transient expression, and  
131 fluorescent microscopy at 72 hours post agro-infiltration (hpi). Consistent with previous  
132 reports (Cui and Wang, 2016), 6K1:GFP fluorescence was only weakly visible  
133 compared to GFP controls using confocal microscopy (Fig. 1A). The kinetics of GFP  
134 and 6K1:GFP accumulation were monitored by western blot analysis using antibodies  
135 that recognize GFP (Fig. 1B). For GFP, protein expression was stable until 72 hpi,  
136 whereas, for 6K1:GFP, protein expression was only detected at 48 hpi (Fig. 1B). Next,  
137 chemical inhibitors were used that target the different protein degradation pathways:  
138 3MA (autophagy inhibitor), MG132 (cysteine protease and proteasomal inhibitor) and  
139 E64 (papain-like cysteine proteases inhibitor) (Fig. 1C). Although 3MA and MG132 did  
140 not impact 6K1:GFP protein accumulation relative to the GFP control, E64 increased  
141 the 6K1:GFP protein accumulation significantly relative to the control (Fig.C). Next, to  
142 assay if 6K1 protein stability is also affected post transcriptionally, an experiment was  
143 performed with a viral suppressor of RNA silencing (VSR), P19, co-infiltrated with  
144 GFP/6K1:GFP. Western blot analysis revealed that 6K1:GFP accumulation was  
145 higher in the presence of P19 in comparison to the control (Fig. 1C). Considering all  
146 the results, 6K1 protein stability in uninfected plant is regulated at both the protein  
147 synthesis and degradation level.

148

149 Protease inhibitors contribute to protein regulation in plants by preventing protein  
150 turnover during development and senescence in plants (Habib and Fazili, 2007). We  
151 hypothesized protease inhibitors may also be reduced, which may contribute to the  
152 increased 6K1 protein turnover when expressed in trans shown here and in previous

153 reports (Cui and Wang, 2016). To determine if protease inhibitors are decreased in  
154 plants expressing 6K1, we measured transcript abundance of the *N. benthamiana*  
155 *Cystatin* protease inhibitor (Niben101Scf00862g02050.1) with the highest identify to a  
156 tomato cystatin that was previously implicated in plant-insect interactions (Goulet et  
157 al., 2008). Relative to the control treatment (GFP), *Cystatin* transcripts were  
158 significantly reduced in presence of 6K1 (Fig. 2A). To determine if other post-  
159 translational regulation pathways contribute to 6K1 turnover, we next measured the  
160 transcript abundance of markers for different protein degradation pathways (*NBR1* for  
161 autophagy, *RPN11* for proteasome) in the same treatments. *NBR1* and *RPN11*  
162 expression were both highly induced in the presence of 6K1 protein relative to the  
163 control (Fig. 2B, C), suggesting multiple pathways contribute to turnover.

164

#### 165 **6K1 expression inhibits transcripts related to jasmonic acid accumulation.**

166 We hypothesized that 6K1 might also alter jasmonic acid accumulation in uninfected  
167 host plants because jasmonic acid is known to regulate the production of protease  
168 inhibitors (Farmer *et al.*, 1992). To address this, we measured the abundance of two  
169 transcripts related to JA biosynthesis, *LIPOXYGENASE1* (*LOX1*) and  
170 *LIPOXYGENASE2* (*LOX2*), in *Nicotiana benthamiana* leaves transiently expressing  
171 the GFP or 6K1:GFP protein. 6K1:GFP expression significantly inhibited *LOX1*, *LOX2*  
172 *transcripts* and JA accumulation compared to controls (Fig. 2D,E). To determine if  
173 inhibition of *LOX1* and *LOX2* is relevant to 6K1:GFP stability, plants that were  
174 previously agro-infiltrated with either GFP/6K1:GFP, were sprayed with an  
175 lipoygenase inhibitor, DIECA (Farmer et al. 1994), 48 hours after infiltration (Fig. 2F).  
176 Western blot analysis revealed that 6K1:GFP accumulation was higher in the  
177 presence of DIECA in comparison to the GFP control (Fig. 2F).

178

179 **Transcriptome wide analyses revealed that aphid and TuMV differentially affect**  
180 **host protein degradation pathways in *A. thaliana***

181 Next we performing RNA-seq to examine the transcriptome of *A. thaliana* in following  
182 different treatments: infected with TuMV, infested with aphids or, when both TuMV and  
183 aphids were present. Differential gene expression analysis revealed TuMV infection  
184 had a greater impact on transcriptional changes compared to aphid infestation (Fig.  
185 S1A, B, C). Overall, 188 and 368 genes were differentially expressed exclusively in  
186 response to aphid and TuMV treatments, respectively, whilst 19 genes were regulated  
187 in both treatments (Fig. S1B). Only 15 transcripts were shared among all treatments,  
188 and the greatest number of transcripts were regulated in the treatment with both  
189 aphids and TuMV compared to controls (Fig. S1C). Gene set enrichment analysis  
190 (GSEA) was used next to determine which biological processes were over-  
191 represented in each treatment (Table S1 and S2). For aphid treatment, categories  
192 related to responses to herbivore, JA, ethylene, and abscisic acid along with JA and  
193 ethylene biosynthetic processes were enriched (Table S2), which are in line to our  
194 previous published data (Bak *et al.*, 2019; Casteel *et al.*, 2015; Hillwig *et al.*, 2016).  
195 For TuMV treatment, GSEA analysis indicated biological process related to salicylic  
196 acid biosynthesis and responses to JA and ethylene were significantly enriched (Table  
197 S1), which were also consistent to our previous findings (Bak *et al.*, 2019; Casteel *et*  
198 *al.*, 2015). Although we observed that though TuMV infection caused the most  
199 substantial changes in gene expression (Fig. S1), it was connected to fewer biological  
200 processes (130) compared to aphids (188). Nevertheless, highest number of biological  
201 processes were found to be regulated when both TuMV and aphids were present (230,  
202 Table S3).



203

204 To study the impact of treatments on specific protein degradation pathways  
205 (autophagy, proteasome, and protease inhibitors/proteases), we next searched the  
206 transcriptome for transcripts whose levels changed >1.5 times (upregulated or  
207 downregulated;  $P < 0.1$ ) relative to the mock in either of the treatments (Fig. 3). Our  
208 data shows TuMV, aphids, or both treatments regulated 5 genes related to autophagy,  
209 10 genes related to the proteasome, 14 related to protease inhibitors, and 46 related  
210 to proteases (Fig. 5A,B,C,D). Specifically, TuMV significantly induced the expression  
211 of *NBR1* (AT4G24690), which has been shown to be up-regulated previously by TuMV  
212 and to have a pro-viral function (Hafrén *et al.*, 2018). The autophagy and proteasome  
213 pathway was found to be most differentially regulated when either TuMV or both TuMV  
214 and aphids were present and least when aphids were present alone. Aphids alone and  
215 aphids with TuMV had the greatest impact on protease inhibitor genes among all the  
216 treatments (Fig. 3C). The greatest number of genes related to proteases were  
217 significantly regulated when TuMV was present either alone or with aphids, whereas  
218 only aphids did not have as large of an impact on proteases (Fig. 3C). Taken together  
219 these results suggest TuMV infection downregulated mostly protease genes and  
220 upregulated some autophagy and proteasome related genes, while aphid feeding  
221 was mostly associated with the downregulation of protease inhibitor genes (Fig.  
222 3A,B,C,D).

223

### 224 **6K1 protein stability increases and protease activity decreases during TuMV** 225 **infection of *N. benthamiana***

226 Next, we expressed 6K1:GFP with and without an infectious clone of TuMV in  
227 *Nicotiana benthamiana*. The kinetics of 6K1:GFP protein accumulation were

228 monitored by western blot analysis using anti-bodies that recognize GFP and with UV  
229 light. Without TuMV infection, a band was detected at 48 and 58 hpi and had an  
230 estimated molecular weight of 33kD, which is around the expected size of the  
231 6K1:GFP fusion (Fig. 4A). After 58 hpi, 6K1:GFP expressed alone was not detected  
232 in the western blot analysis (Fig. 4A) or by UV light (Fig. S4). In contrast, 6K1:GFP in  
233 the presence of TuMV was detected at all time points in western blot analysis (Fig.  
234 4A) and was visible with UV light in plants 120 hpi (Fig. S4). At early time points (48  
235 and 58hpi), protein levels of 6K1:GFP were reduced in the presence of TuMV  
236 compared to without the infectious clone (Fig. 4A). As a control we conducted a similar  
237 experiment using GFP with and without TuMV (Fig. 4B) and found similar results (Fig.  
238 4A). As the previous experiments demonstrated protease inhibitors and proteases are  
239 critical for 6K1 turnover (Fig. 2), biochemical assays were performed to quantify the  
240 total protease activity in the same treatments at 120h. Total protease activity was  
241 reduced when 6K1:GFP was expressed in the presence of TuMV compared to without  
242 TuMV (Fig. 4C), however there was no difference between the GFP treatments (Fig.  
243 4D).

244

245 To further investigate the role of 6K1 in inhibiting protease activity during TuMV  
246 infection, we next measured the abundance of the *Cystatin* transcript and total  
247 protease activity in plants transiently expressing GFP or 6K1:GFP in the presence of  
248 TuMV (Fig. 4E,F). In this experiment, transient expression of the 6K1 protein  
249 significantly induced transcript accumulation of the protease inhibitor, *Cystatin*,  
250 compared to the GFP control in the presence of TuMV (Fig. 4E). There was also a  
251 highly significant inhibition of protease activity when 6K1 was expressed in the  
252 presence of TuMV compared to the GFP control (Fig. 4F). These results suggest 6K1

253 expression can decrease plant protease activity, however as 6K1:GFP was not able  
254 to inhibit *Cystatin* in uninfected plants (Fig. 1), additional TuMV proteins or TuMV-  
255 induced plant proteins are required for this function during infection.

256

## 257 **TuMV accumulation is increased in systemic leaves in the presence of the** 258 **ectopically expressed 6K1:GFP**

259 Our results above demonstrate 6K1 degrades rapidly at earlier time points in infection,  
260 whereas at later stages of infection it becomes more stable, when systemic infection  
261 is more important. To determine the impact of transiently expressed 6K1 on virus  
262 movement, leaves were infiltrated with either TuMV or TuMV co-infiltrated with GFP  
263 or 6K1:GFP and the abundance of coat protein transcripts were quantified in local and  
264 systemic leaves. Virus coat protein transcripts accumulated to a similar level in local  
265 leaves in which only TuMV was infiltrated compared to leaves co-infiltrated with TuMV  
266 and either GFP or 6K1:GFP (Fig. 5A). In systemic leaves greater amounts of TuMV  
267 CP transcripts were detected when 6K1:GFP was co-infiltrated with TuMV relative to  
268 the control treatment (Fig. 5B).

269

## 270 **DISCUSSIONS**

271

272 In this study, we demonstrate that the stability of the 6K1 protein is dynamic and  
273 increases over time in the presence of TuMV (Fig. 4). Decreased stability of the  
274 ectopically expressed 6K1 was due to post-transcriptional changes and due to  
275 changes in protein degradation (Fig. 1). It was previously reported that the expression  
276 of 6K1 protein *in-vivo* is quite low and affinity purification was required to detect PPV's  
277 6K1 protein during viral infection (Waltermann and Maiss, 2006). In our study transient

278 expression of the 6K1 protein was lowest 48 hpi relative to other time point in virus  
279 infected plants and increased overtime (Fig. 4A). A similar observation was reported  
280 in Waltermann and Maiss (2006) where the 6K1 protein was not detected at 48 hpi in  
281 virus infected plants, but at 96 hpi they were able to detect it. It is important to note  
282 when a second GFP-tagged copy of PPV's 6K1 was expressed in *cis* from an  
283 infectious clone, increased stability of 6K1 was not observed overtime (Cui and Wang,  
284 2016). In our construct the cleavage site was retained at the C-terminus of 6K1 before  
285 the GFP sequence, so that during virus infection 6K1 could still be cleaved from GFP  
286 to avoid any negative impacts on function. It is tempting to speculate that early in the  
287 potyvirus infection process the 6K1 protein may be inhibited by the virus or plant, while  
288 later in the infection process 6K1 stability is increased enabling new functions. For  
289 example, we demonstrated ectopic expression of 6K1 increased viral accumulation in  
290 systemic leaves (Fig. 5), suggesting 6K1's increased stability may play a role in  
291 regulating viral movement.

292

293 We observed higher accumulation of the transiently expressed 6K1 protein in the  
294 presence of P19 VSR, which suggests the 6K1 mRNA is unstable and a target of host  
295 RNA silencing machinery (Fig. 1C). As the activation of host RNA silencing machinery  
296 is one of the primary defence responses that target viruses (Calil and Fontes, 2017;  
297 Wang *et al.*, 2012), it seems reasonable that parts of the viral RNA genome will be  
298 potent activators of RNA silencing. Nevertheless, potyviruses code for VSRs (HCPro  
299 and VPg) to ensure successful virus infection (Eskelin *et al.*, 2011; Valli *et al.*, 2018).  
300 Indeed, the work of LaTourrette and Garcia-Ruiz., (2021) showed that HC-Pro is  
301 mostly bounds to 21 nt siRNAs of viral origin thus, preventing host gene silencing  
302 pathway from targeting viral RNA. Recently, papain-like cysteine proteases (PLCPs)

303 have been showed to play an important role in host defences against many pathogens  
304 including viruses (Bar-Ziv *et al.*, 2012; Bar-Ziv *et al.*, 2015; Misas-Villamil *et al.*, 2016).  
305 We show here proteases do have a role in degradation of the ectopically expressed  
306 6K1 protein, as protein accumulation increased in the E64 treatment, a chemical  
307 inhibitor of PLCPs (Fig.1C). Many PLCPs are localised in autolysosomes, suggesting  
308 a role of the autophagy pathway in the degradation of 6K1 protein (Bárány *et al.*, 2018;  
309 Nakahara *et al.*, 2012) However, there was no change in 6K1 protein accumulation in  
310 the treatment with 3-MA, an inhibitor of the autophagy pathway (Fig. 1C). Surprisingly,  
311 we did observe 6K1 expression causes a significant increase in *NBR1* and *RPN11*  
312 (Fig 2B,C), two transcripts related to autophagy and the proteasome degradation  
313 pathway respectively, which suggest additional studies are required to determine their  
314 role in 6K1 stability. We go further and demonstrate that protease activity, and papain-  
315 like cysteine protease inhibitors are regulated by 6K1 (Fig. 4) and TuMV infection (Fig.  
316 3). Overall, our data suggests that the protein stability of ectopically expressed 6K1 is  
317 regulated at multiple levels and paves the way for additional investigations on the 6K1  
318 protein and the complex molecular mechanisms associated with a successful virus  
319 infection.

320

321 Previous studies have shown that 6K1 has a role in viral replication and may mediate  
322 cell-to-cell movement (Cui and Wang, 2016; Geng *et al.*, 2017; Hong *et al.*, 2007;  
323 Löhmus *et al.*, 2016). Our data provides evidence of a novel function associated to  
324 6K1 protein *i.e.*, inhibition of JA biosynthesis transcripts (Fig. 2D,E,F). It is well  
325 established that phytohormones mediate many different components of plant-virus-  
326 insect interactions and may regulate virus transmission (Farmer *et al.*, 1992; Abe *et al.*  
327 *et al.*, 2012; Bera *et al.*, 2020; Lewsey *et al.*, 2010; Tian *et al.*, 2015; Parizad and Bera

2021; Basu *et al.*, 2021; Lee *et al.*, 2021). Inhibition of JA in the presence of 6K1 protein may indicate a possible role of 6K1 in mediating ecological interactions. Indeed, it was shown that 6K1 decreases aphid fecundity (Casteel *et al.*, 2014) and aphids induce JA in plants (Casteel *et al.*, 2015), suggesting a positive effect of JA on aphids. Taken together, it can be speculated that 6K1-mediated inhibition of JA may result in the poor performance of aphids we previously observed.

334

As viral proteins are often associated with more than one function thus, it is critical to assay their function throughout virus life cycle and under different ecological conditions. Our results also support earlier observation of 6K1's role in systemic movement using ectopic expression with and without the virus instead of mutating infectious clone (Fig. 5). As viral RNA acts as an open reading frame and may also form a functional RNA element, mutating a part of the viral genome can be detrimental to virus survival (Ilyas *et al.*, 2021; Liu *et al.*, 2021). The evolution of potyviruses with plants has progressed for about 15,000 to 30,000 years and the emergence of new potyviral species are still being documented (Gibbs *et al.*, 2020; Parizad *et al.*, 2018). Further, potyviruses are among the most widely distributed pathogens in crops, hampering the production and the quality of food (Karasev and Gray, 2013; Moratalla-lópez *et al.*, 2021). While our study paves the way for more thorough investigation of the 6K1 protein, its' multifunctionality, and role in plant-virus-aphid interactions, a thorough understanding of the underlying molecular mechanism causing potyviruses disease will be required to develop innovative intervention strategies and prevent viral epidemics in the future.

351

352 **EXPERIMENTAL PROCEDURES**

353 **Plants and growth conditions**

354 *Nicotiana benthamiana* and *Arabidopsis thaliana* plants were grown in growth  
355 chambers under controlled conditions (25/20 °C day/night with a photoperiod of 14/10  
356 h day/night) at a relative humidity of 50% and a light intensity of 200 mmol m<sup>-2</sup> s<sup>-1</sup>.  
357 Plants were grown for 3 to 4 weeks and were used in experiments before flowering,  
358 unless otherwise noted.

359

360 **Virus inoculation**

361 TuMV was propagated from the infectious clone pCAMBIA:TuMV, kindly provided by  
362 Prof. Jean-Francois Laliberte. In all the experiments using pCAMBIA:TuMV, virus  
363 inoculation was mediated by the agro-infiltration of the agrobacterial culture after  
364 diluting to an optical density of 0.03 at 600 nm, unless otherwise noted.

365

366 **Plasmid constructs**

367 The 6K1:GFP constructs and its derivatives were produced using the Gibson cloning  
368 kit (New England Biolabs, Ipswich, MA) following the manufacturer's instructions.  
369 Briefly, compatible gene-specific Gibson primers were designed to perform PCR and  
370 the PCR product and the digested pMDC32 vector were joined using Gibson  
371 assembly. To clone 6K1 and GFP into pMDC32 plasmid, p35:TuMV/GFP (Casteel *et*  
372 *al.*, 2014) was used as a template to amplify 6K1 and GFP separately. pMDC32:6K1,  
373 pMDC32:6K1:GFP, and pMDC32:GFP were then assembled as above using the  
374 Gibson kit.

375

376 **Transient protein expression in *Nicotiana benthamiana***

377 All the plasmid constructs were introduced into *Agrobacterium tumefaciens* GV3101  
378 separately by heat shock and selected on LB plus 10  $\mu\text{g ml}^{-1}$  of rifampicin and 50  $\mu\text{g}$   
379  $\text{ml}^{-1}$  of kanamycin. One fresh colony was selected and grown overnight in liquid culture  
380 with the same antibiotic selection as before. The pellet of the culture was resuspended  
381 in 10mM  $\text{MgCl}_2$  and 150  $\mu\text{M}$  acetosyringone and left at room temperature for 2 – 3 h  
382 in a dark room. The solution containing the agrobacterial culture was then diluted to  
383 an optical density of 0.2 at 600nm for transient expression experiments and at 0.1 for  
384 co-infiltrating with the TuMV infectious clone. Single leaves from 4-week-old *N.*  
385 *benthamiana* plants were then agro-infiltrated with the agrobacterium culture  
386 suspended in  $\text{MgCl}_2$  and acetosyringone. After agro-infiltration, leaf tissue (100 mg)  
387 was collected 48 hours post infiltration and, thereafter samples were taken at 72 hours,  
388 5 days, from separate plants and according to the individual experiment's  
389 design. Expression was verified by microscopy, RT-PCR and/or western blot analysis  
390 as described below.

391

### 392 **Chemical inhibitors treatments**

393 To investigate how the ectopically expressed 6K1 protein gets degraded, several  
394 assays with chemicals were performed that inhibit specific pathways of protein  
395 degradation in plants. MG132 (Sigma-Aldrich, St. Louis, MO), and 3Methyladenine  
396 (3MA) (Tci America, Tokyo, Japan) were used to inhibit the proteasomal degradation  
397 and autophagy pathways, respectively and, E64 (Sigma-Aldrich, St. Louis, MO) was  
398 used to inhibit the cysteine proteases. The 3MA (10mM) solution was prepared by  
399 dissolving it in phosphate buffered saline (PBS) containing 2% DMSO. MG132 (50 $\mu\text{M}$ )  
400 was prepared in PBS and E64 (50 and 100 $\mu\text{M}$ ) was prepared in water. Forty-eight  
401 hours after 6K1 agro-infiltration, chemical inhibitors (1 ml) were infiltrated in the



402 previously agro-infiltrated leaves. Post agro-infiltration samples were collected at  
403 60hpi.

404

#### 405 **Microscopy**

406 Leaves were cut into small pieces and placed on glass slides and observed with a  
407 Leica TCS SP5 confocal laser scanning microscope system (Leica Micro- systems,  
408 Bannockburn, IL, USA). GFP fluorescence was detected with excitation at 488nm and  
409 emission capture at 500–530 nm. Images were captured at 2,361 nm intervals using  
410 a 10x objective.

411

#### 412 **Western blotting**

413 Leaf tissue was collected and flash frozen in liquid nitrogen. Later it was crushed in a  
414 lysis buffer (10mM sodium citrate, 1% SDS, 30mM NaCl, 0.4% 2-mercaptoethanol, 2X  
415 EDTA-free protease inhibitor cocktail) and boiled for 10 min in a 1.5 ml tube. The  
416 supernatant was mixed with an equal volume of loading dye and fractionated by a 12%  
417 SDS–polyacrylamide gel electrophoresis gel under reducing conditions. Afterwards  
418 protein bands were transferred to a nitrocellulose membrane using a transfer  
419 apparatus according to the manufacturer's protocols (Bio-Rad, Hercules, CA). After  
420 incubation with 5% nonfat milk in TBST (50mM Tris-Cl, 150mM NaCl, 0.1% TWEEN  
421 20) for 2 h, the membrane was incubated with an antibody against GFP (1:5,000  
422 dilution) for 2 h at room temperature. The GFP antibody was already conjugated to  
423 the horseradish peroxidase (Anti-GFP-HRP, <http://www.miltenyibiotec.com>, #130-  
424 091-833). Blots were washed with TBST three times for 15 min each and developed  
425 with an enhanced chemiluminescence system according to the manufacturer (Bio-  
426 Rad, Hercules, CA).

427

## 428 **Quantification of RNA**

429 Total plant RNA extraction and DNase treatment were performed using the SV Total  
430 RNA Isolation Kit (Promega, Madison, WI, USA), followed by Reverse Transcription  
431 with SMART<sup>®</sup> MMLV (Takara Bio USA, Mountain view, CA, USA). cDNA was  
432 synthesized using Oligo dT from 1 µg of total RNA. Viral RNA and GFP transcripts  
433 were quantified relative to the actin transcripts using reverse transcription quantitative  
434 real-time PCR (RT-qPCR). All the primers used for quantification are listed in Table  
435 S4. RT-qPCR was performed using the Bio-Rad CFX384<sup>™</sup> Real-Time System in a  
436 10-µL mixture containing SYBR Green PCR Master Mix (Applied Biosystems, Foster  
437 City, CA, USA). The thermocycling conditions were: 2 min polymerase activation at 50  
438 °C followed by initial denaturation for 2 min at 95 °C and 45 cycles at 95 °C for 15 s,  
439 60 / 55 °C for 1 min. Each sample was quantified in triplicates and a no template  
440 control was included. Cycle time values were automatically determined for all plates  
441 and genes using the Bio-Rad CFX384<sup>™</sup> Real-Time System software. Analysis of RT-  
442 qPCR fluorescence data was performed and expressed in fold change relative to actin  
443 using the  $\Delta\Delta CT$  method (Livak and Schmittgen 2001).

444

## 445 **Phytohormone Analysis**

446 Phytohormones were extracted using a protocol mentioned in Bera *et al.*, 2020. Briefly,  
447 frozen samples were homogenized with one milliliter of extraction buffer  
448 (isopropanol:water:HCl [2:1:0.005, v/v]) along with internal standards (d<sub>4</sub>- salicylic acid  
449 and d<sub>5</sub>- jasmonic acid; CDN Isotopes). After dichloromethane extraction, samples  
450 were redissolved in 100µL of methanol, and 10µL was analyzed using an Agilent

451 Technologies 6420 triple quad liquid chromatography-tandem mass spectrometry  
452 instrument (Agilent, Santa Clara, CA, USA) as in Patton *et al.*, (2019).

453

454 **RNA-seq experiment.** Wild-type *Arabidopsis thaliana* Columbia-0 were  
455 obtained from the Arabidopsis Biological Resource Center  
456 (<http://www.arabidopsis.org>). After 3 weeks of growth, one-half of the plants was  
457 infected with TuMV-GFP as described above. After 1 week, infected plants were  
458 identified by fluorescence under UV light. For aphid induction, 15 adult apterous  
459 aphids were caged on one leaf per plant for six different plants (uninfected plants). A  
460 corresponding set of six plants received cages with no aphids as a mock-inoculated  
461 control and six TuMV-GFP infected plants received cages to control for cages on the  
462 other plants. Caged leaves were developmentally matched, and infected leaves were  
463 verified for full infection before caging based on GFP visualization. Forty-eight hours  
464 after aphid placement, cages and aphids were removed and two leaves were pooled  
465 for each sample resulting in 3 replicates of pooled leaves for each treatment. RNA was  
466 then extracted as described above.

467

468 **Library Preparation, and Sequencing.** Sequencing libraries were prepared using a  
469 multiplexing library protocol (Zhong *et al.*, 2011). Briefly, oligo(dT) Dynabeads were  
470 used to purify mRNA, which was then fragmented, and the first-strand  
471 cDNA was synthesized using random primers, dNTP, and reverse transcriptase. The  
472 second-strand was synthesized using a dUTP mix, DNA Polymerase I, and RNase H,  
473 ends repaired, and adenylated. The cDNA fragments were ligated to adapters,  
474 selectively enriched by PCR, and purified using 138the AMPure XP beads. The library

475 quality was assessed using the Agilent Bioanalyzer 2100 system and sequenced  
476 using an Illumina HiSeq 2000 instrument

477

478 **RNA-Seq data analysis.** The quality of the raw reads was assessed with FASTQC  
479 and ShortRead. All samples presented reads with high quality. Reads were mapped  
480 against *Arabidopsis thaliana* TAIR10 genome using TopHat2 (Kim *et al.*, 2013). The  
481 number of reads per gene was counted using HT-Seq and normalized using the  
482 normalization method implemented inside the edgeR Bioconductor package. The  
483 clusterization profile of the normalized samples was verified by Principal Component  
484 Analysis (PCA) and Spearman correlation. Differential expression test was conducted  
485 using edgeR, according to (Anders *et al.*, 2013), using mock-infected samples as the  
486 reference control treatment. Genes with a FDR-corrected p-value lower than 0.1  
487 were considered as differentially expressed genes (DEGs). Reads are available at the  
488 NCBI SRA (PRJNA60524).

489

490 **Gene Set Enrichment Analysis (GSEA).** To identify molecular mechanisms  
491 potentially relevant to the plant response to TuMV and aphids, a GSEA was  
492 conducted. The GSEA identified biological processes (BPs), molecular functions  
493 (MFs) and cellular components (CCs) that were over-represented among a list of  
494 DEGs. Categories with a p-value lower than 0.005 in a hypergeometric test were  
495 considered enriched.

496

497 **Protease and protease inhibitor assays.** Twenty *Nicotiana benthamiana* plants that  
498 were 4-weeks old were agro-infiltrated with TuMV as described earlier. Five days post  
499 infiltration, the third youngest leaf of ten plants each were agro-infiltrated with 6K1-

500 GFP or empty vector containing GFP construct (EV-GFP) and 100mg of plant tissue  
501 were collected 60hrs post inoculation. To evaluate the effect of proteases in virus  
502 infected plants in early stages of infection, twenty four 4-week old plants were also co-  
503 infiltrated with TuMV and either GFP or 6K1 (twelve plants for each treatment), and  
504 tissues were collected after 60hr. Plant tissues were homogenized in 1ml of 0.046M  
505 Tris-HCl and 0.0115M CaCl<sub>2</sub> buffer (pH=8.1) with 5% polyvinylpolypyrrolidone. The  
506 homogenized samples were incubated on ice for 10mins followed by centrifugation at  
507 11,000g for 10mins at 4C. The supernatant containing the soluble proteins from the  
508 leaves were then used for assays. Total protein extracted in each sample was  
509 measured by Bradford assay (Bradford, 1975). Fifty microliters of the protein extract  
510 were used to measure total protease activity in each sample using FITC Casein  
511 according to manufacturer's protocol (Sigma Aldrich, USA). Known concentrations of  
512 trypsin was used as standards for protease assay. Protease activity in each sample  
513 was reported as equivalent amount of trypsin activity per mg of total protein.

514

### 515 **Statistical Analysis**

516 The distribution of all values for all variables was analyzed to test for normality using  
517 the Shapiro-Wilk test (Sokal and Rohlf 1995) and were also tested for homogeneity of  
518 variances using the Levene test (Sokal and Rohlf, 1995). To determine if 6K1  
519 expression impacts virus infection in local and systemic leaves (Fig. 5), the data were  
520 analyzed by generalized linear models (GLM) with a normal distribution curve which  
521 fitted the observed data. The model included treatments (TuMV, GFP, 6K1:GFP) and  
522 leaves (local, systemic) as fixed factor in a full factorial model. The GLM analysis was  
523 selected because it is a robust method with respect to the distribution of the data and  
524 allows contrasting both balanced and non-balanced models. To determine if the

525 observed differences between classes of the same factor were significant, least  
526 significant difference (LSD) analysis were performed. The data related to Fig. 1, 2, and  
527 4 were analyzed either by *t*-test or Kruskal-Wallis test. To determine if the protease  
528 activity between 6K1-GFP and EV-GFP treated plants were different from each other  
529 (Fig. 4C,D,F), the data was log transformed to meet assumptions of normality and a  
530 one-way ANOVA was performed at  $\alpha < 0.05$  using R. The statistical analyses were  
531 performed using the SPSS v.24.0 program (SPSS Inc., IL, USA).

532

533 **Acknowledgments.** This work was supported by NSF award 1723926 to CLC. We  
534 thank Jacob Tracy for excellent technical assistance.

535

536 Author contributions. CLC and SB conceived the project. SB and CLC designed the  
537 research. SB, GA, SF, SR, and CLC performed the research and analyzed the data.  
538 CLC and SB interpreted the data. CLC and SB wrote the article.

539

## 540 REFERENCES

541 **Abe, H., Tomitaka, Y., Shimoda, T., Seo, S., Sakurai, T., Kugimiya, S., Tsuda, S.**

542 **and Kobayashi, M.** (2012) Antagonistic plant defense system regulated by  
543 phytohormones assists interactions among vector insect, thrips and a  
544 tospovirus. *Plant Cell Physiol.* **53**, 204–212.

545 **Anders, S., McCarthy, D.J., Chen, Y., Okoniewski, M., Smyth, G.K., Huber, W.**

546 **and Robinson, M.D.** (2013) Count-based differential expression analysis of  
547 RNA sequencing data using R and Bioconductor. *Nat. Protoc.* **8**, 1765–1786.

548 **Bak, A., Cheung, A.L., Yang, C., Whitham, S.A. and Casteel, C.L.** (2017) A viral

549 protease relocalizes in the presence of the vector to promote vector

- 550 performance. *Nat. Commun.* **8**, 1–10.
- 551 **Bak, A., Patton, M.K.F., Perilla-Henao, L.M., Aegerter, B.J. and Casteel, C.L.**  
552 (2019) Ethylene signaling mediates potyvirus spread by aphid vectors.  
553 *Oecologia* **190**, 139–148.
- 554 **Bar-Ziv, A., Levy, Y., Citovsky, V. and Gafni, Y.** (2015) The Tomato yellow leaf  
555 curl virus (TYLCV) V2 protein inhibits enzymatic activity of the host papain-like  
556 cysteine protease CYP1. *Biochem. Biophys. Res. Commun.* **460**, 525–529.
- 557 **Bar-Ziv, A., Levy, Y., Hak, H., Mett, A., Belausov, E., Citovsky, V. and Gafni, Y.**  
558 (2012) The Tomato yellow leaf curl virus (TYLCV) V2 protein interacts with the  
559 host papain-like cysteine protease CYP1. *Plant Signal. Behav.* **460**, 525–529.
- 560 **Bárány, I., Berenguer, E., Solís, M.T., Pérez-Pérez, Y., Santamaría, M.E.,**  
561 **Crespo, J.L., Risueño, M.C., Díaz, I. and Testillano, P.S.** (2018) Autophagy is  
562 activated and involved in cell death with participation of cathepsins during  
563 stress-induced microspore embryogenesis in barley. *J. Exp. Bot.* **69**, 1387–  
564 1402.
- 565 **Bradford MM** (1976) A rapid and sensitive method for the quantitation of microgram  
566 quantities of protein utilizing the principle of protein-dye binding. *Anal Biochem*  
567 **72**: 248–25
- 568 **Bera, S., Blundell, R., Liang, D., Crowder, D.W. and Casteel, C.L.** (2020) The  
569 oxylipin signaling pathway is required for increased aphid attraction and  
570 retention on virus-infected plants. *J. Chem. Ecol.*
- 571 **Calil, I.P. and Fontes, E.P.B.** (2017) Plant immunity against viruses: Antiviral  
572 immune receptors in focus. *Ann. Bot.* **119**, 711–723.
- 573 **Callaway, A., Gillock, E.T., Sit, T.L. and Lommel, S.A.** (2001) The multifunctional  
574 capsid proteins of plant RNA viruses. *Annu. Rev. Phytopathol.* **39**, 419–460.

- 575 **Casteel, C.L., Alwis, M. De, Bak, A., Dong, H., Whitham, S.A. and Jander, G.**  
576 (2015) Disruption of ethylene responses by Turnip mosaic virus mediates  
577 suppression of plant defense against the green peach aphid vector. *Plant*  
578 *Physiol.* **169**, 209–218.
- 579 **Casteel, C.L., Yang, C., Nanduri, A.C., Jong, H.N. De, Whitham, S.A. and**  
580 **Jander, G.** (2014) The NIa-Pro protein of Turnip mosaic virus improves growth  
581 and reproduction of the aphid vector, *Myzus persicae* (green peach aphid). *Plant*  
582 *J.* **77**, 653–663.
- 583 **Cheng, X. and Wang, A.** (2017) The potyvirus silencing suppressor protein VPg  
584 mediates degradation of SGS3 via ubiquitination and autophagy pathways. *J.*  
585 *Viro.* **91**, 1–16.
- 586 **Chung, B.Y.W., Miller, W.A., Atkins, J.F. and Firth, A.E.** (2008) An overlapping  
587 essential gene in the Potyviridae. *Proc. Natl. Acad. Sci. U. S. A.* **105**, 5897–  
588 5902.
- 589 **Chung, S.H. and Felton, G.W.** (2011) Specificity of induced resistance in Tomato  
590 against specialist Lepidopteran and Coleopteran species. *J. Chem. Ecol.* **37**,  
591 378–386.
- 592 **Cui, H. and Wang, A.** (2016) Plum pox virus 6K1 protein is required for viral  
593 replication and targets the viral replication complex at the early stage of  
594 infection. *J. Viro.* **90**, 5119–5131.
- 595 **Deng, P., Wu, Z. and Wang, A.** (2015) The multifunctional protein CI of potyviruses  
596 plays interlinked and distinct roles in viral genome replication and intercellular  
597 movement. *Viro. J.* **12**, 1–11.
- 598 **Elena, S.F., Fraile, A. and García-Arenal, F.** (2014) Evolution and emergence of  
599 plant viruses. *Adv. Virus Res.* **88**, 161–191.



- 600 **Eskelin, K., Hafren, A., Rantalainen, K.I. and Makinen, K.** (2011) Potyviral VPg  
601 enhances viral RNA translation and inhibits reporter mRNA translation In *Planta*.  
602 *J. Virol.* **85**, 9210–9221.
- 603 **Farmer, E.E., Johnson, R.R. and Ryan, C.A.** (1992) Regulation of expression of  
604 proteinase inhibitor genes by methyl jasmonate and jasmonic acid. *Plant*  
605 *Physiol.* **98**, 995–1002.
- 606 **García, J.A., Martín, M.T., Cervera, M.T. and Riechmann, J.** (1992) Proteolytic  
607 processing of the plum pox potyvirus polyprotein by the Nla protease at a novel  
608 cleavage site. *Virology* **188**, 697–703.
- 609 **Geng, C., Yan, Z., Ch, D., Liu, J., Tian, Y. and Zhu, C.** (2017) Tobacco vein  
610 banding mosaic virus 6K2 protein hijacks NbPsbO1 for virus replication. *Sci.*  
611 *Rep.* **7**, 1–16.
- 612 **Gibbs, A.J., Hajizadeh, M., Ohshima, K. and Jones, R.A.C.** (2020) The  
613 Potyviruses: An evolutionary synthesis Is emerging. *Viruses* **12**, 1–30.
- 614 **Goulet, M.C., Dallaire, C., Vaillancourt, L.P., et al.** (2008) Tailoring the specificity  
615 of a plant cystatin toward herbivorous insect digestive cysteine proteases by  
616 single mutations at positively selected amino acid sites. *Plant Physiol.* **146**,  
617 1010–1019.
- 618 **Habib, H. and Fazili, K.M.** (2007) Plant protease inhibitors : a defense strategy in  
619 plants. *Biotechnol. Mol. Biol. Rev.* **2**, 68–85.
- 620 **Hafrén, A., Macia, J.-L., Love, A.J., Milner, J.J., Drucker, M. and Hofius, D.**  
621 (2017) Selective autophagy limits cauliflower mosaic virus infection by NBR1-  
622 mediated targeting of viral capsid protein and particles. *Proc. Natl. Acad. Sci.*  
623 **114**, E2026–E2035.
- 624 **Hafrén, A., Üstün, S., Hochmuth, A., Svenning, S., Johansen, T. and Hofius, D.**

- 625 (2018) Turnip mosaic virus counteracts selective autophagy of the viral silencing  
626 suppressor HCpro. *Plant Physiol.* **176**, 649–662.
- 627 **Hillwig, M.S., Chiozza, M., Casteel, C.L., Lau, S.T., Hohenstein, J., Hernández,**  
628 **E., Jander, G. and Macintosh, G.C.** (2016) Abscisic acid deficiency increases  
629 defence responses against *Myzus persicae* in *Arabidopsis*. *Mol. Plant Pathol.*  
630 **17**, 225–235.
- 631 **Hong, X.Y., Chen, J., Shi, Y.H. and Chen, J.P.** (2007) The “6K1” protein of a strain  
632 of Soybean mosaic virus localizes to the cell periphery. *Arch. Virol.* **152**, 1547–  
633 1551.
- 634 **Honjo, M.N., Emura, N., Kawagoe, T., Sugisaka, J., Kamitani, M., Nagano, A.J.**  
635 **and Kudoh, H.** (2020) Seasonality of interactions between a plant virus and its  
636 host during persistent infection in a natural environment. *ISME J.* **14**, 506–518.
- 637 **Ilyas, M., Du, Z. and Simon, A.E.** (2021) Opium Poppy Mosaic Virus Has an Xrn-  
638 Resistant, Translated Subgenomic RNA and a BTE 3' CITE . *J. Virol.* **95**, 1–21.
- 639 **Ismayil, A., Yang, M. and Liu, Y.** (2019) Role of autophagy during plant-virus  
640 interactions. *Semin. Cell Dev. Biol.*
- 641 **Ivanov, K.I., Puustinen, P., Gabrenaite, R., Vihinen, H., Rönstrand, L., Valmu,**  
642 **L., Kalkkinen, N. and Mäkinen, K.** (2003) Phosphorylation of the potyvirus  
643 capsid protein by protein kinase CK2 and its relevance for virus infection. *Plant*  
644 *Cell* **15**, 2124–2139.
- 645 **Jiang, J., Patarroyo, C., Garcia Cabanillas, D., Zheng, H. and Laliberté, J.-F.**  
646 (2015) The vesicle-forming 6K2 protein of Turnip mosaic virus interacts with the  
647 COPII coatomer Sec24a for viral systemic Infection. *J. Virol.* **89**, 6695–6710.
- 648 **Johansen, I.E., Lund, O.S., Hjulsager, C.K. and Laursen, J.** (2001) Recessive  
649 resistance in *Pisum sativum* and potyvirus pathotype resolved in a gene-for-

- 650 cistron correspondence between host and virus. *J. Virol.* **75**, 6609–6614.
- 651 **Karasev, A. V. and Gray, S.M.** (2013) Continuous and emerging challenges of  
652 Potato virus Y in Potato. *Annu. Rev. Phytopathol.* **51**, 571–586.
- 653 **Kekarainen, T., Savilahti, H. and Valkonen, J.P.T.** (2002) Functional genomics on  
654 Potato virus A: Virus genome-wide map of sites essential for virus propagation.  
655 *Genome Res.* **12**, 584–594.
- 656 **Kim, D., Pertea, G., Trapnell, C., Pimentel, H., Kelley, R. and Salzberg, S.L.**  
657 (2013) TopHat2: accurate alignment of transcriptomes in the presence of  
658 insertions, deletions and gene fusions. *genome Biol.* **14**.
- 659 **Lewsey, M.G., Murphy, A.M., MacLean, D., et al.** (2010) Disruption of two  
660 defensive signaling pathways by a viral RNA silencing suppressor. *Mol. Plant-*  
661 *Microbe Interact.* **23**, 835–845.
- 662 **Li, F., Zhang, C., Li, Y., Wu, G., Hou, X., Zhou, X. and Wang, A.** (2018) Beclin1  
663 restricts RNA virus infection in plants through suppression and degradation of  
664 the viral polymerase. *Nat. Commun.* **9**, 1–17.
- 665 **Li, F., Zhang, C., Tang, Z., et al.** (2020) A plant RNA virus activates selective  
666 autophagy in a UPR-dependent manner to promote virus infection. *New Phytol.*
- 667 **Liu, J., Carino, E., Bera, S., Gao, F., May, J.P. and Simon, A.E.** (2021) Structural  
668 Analysis and Whole Genome Mapping of a New Type of Plant Virus Subviral  
669 RNA : Umbravirus-Like Associated RNAs. *Viruses* **13**.
- 670 **Löhmus, A., Varjosalo, M. and Mäkinen, K.** (2016) Protein composition of 6K2-  
671 induced membrane structures formed during Potato virus A infection. *Mol. Plant*  
672 *Pathol.* **17**, 943–958.
- 673 **May, J.P., Johnson, P.Z., Ilyas, M., Gao, F. and Simon, E.** (2020) The  
674 multifunctional long-distance movement protein of Pea Enation Mosaic Virus 2

675 protects viral and host transcripts from nonsense-mediated decay. *MBio* **11**, 1–  
676 16.

677 **Merits, A., Rajamäki, M.L., Lindholm, P., Runeberg-Roos, P., Kekarainen, T.,**  
678 **Puustinen, P., Mäkeläinen, K., Valkonen, J.P.T. and Saarma, M.** (2002)

679 Proteolytic processing of potyviral proteins and polyprotein processing  
680 intermediates in insect and plant cells. *J. Gen. Virol.* **83**, 1211–1221.

681 **Misas-Villamil, J.C., Hoorn, R.A.L. van der and Doehlemann, G.** (2016) Papain-  
682 like cysteine proteases as hubs in plant immunity. *New Phytol.* **212**, 902–907.

683 **Moratalla-lópez, N., Parizad, S., Koohi, M., et al.** (2021) Impact of two different  
684 dehydration methods on saffron quality, concerning the prevalence of Saffron  
685 latent virus ( SaLV ) in Iran. *Food Chem.* **337**.

686 **Nakahara, K.S., Masuta, C., Yamada, S., et al.** (2012) Tobacco calmodulin-like  
687 protein provides secondary defense by binding to and directing degradation of  
688 virus RNA silencing suppressors. *Proc. Natl. Acad. Sci. U. S. A.* **109**, 10113–  
689 10118.

690 **Parizad, S., Dizadji, A., Koohi Habibi, M., Winter, S., Kalantari, S., Movi, S.,**  
691 **García-Arenal, F. and Ayllón, M.A.** (2018) Description and genetic variation of  
692 a distinct species of Potyvirus infecting saffron (*Crocus sativus* L.) plants in  
693 major production regions in Iran. *Ann. Appl. Biol.*, accepted.

694 **Patton, M.F., Bak, A., Sayre, J.M., Heck, M.L. and Casteel, C.L.** (2019) A  
695 polerovirus, Potato leafroll virus, alters plant–vector interactions using three viral  
696 proteins. *Plant Cell Environ.*, 1–13.

697 **Ray, S., Basu, S., Rivera-Vega, L.J., Acevedo, F.E., Louis, J., Felton, G.W. and**  
698 **Luthe, D.S.** (2016) Lessons from the far end: Caterpillar FRASS-induced  
699 defenses in Maize, Rice, Cabbage, and Tomato. *J. Chem. Ecol.* **42**, 1130–1141.

- 700 **Revers, F. and García, J.A.** (2015) *Molecular Biology of Potyviruses* 1st ed.,  
701 Elsevier Inc.
- 702 **Schlub, T.E. and Holmes, E.C.** (2020) Properties and abundance of overlapping  
703 genes in viruses. *Virus Evol.* **6**, 1–8.
- 704 **Tian, M., Sasvari, Z., Gonzalez, P.A., Friso, G., Rowland, E., Liu, X.M., Wijk, K.J.**  
705 **Van, Nagy, P.D. and Klessig, D.F.** (2015) Salicylic acid inhibits the replication  
706 of Tomato bushy stunt virus by directly targeting a host component in the  
707 replication complex. *Mol. Plant-Microbe Interact.* **28**, 379–386.
- 708 **Valli, A.A., Gallo, A., Rodamilans, B., López-Moya, J.J. and García, J.A.** (2018)  
709 The HCPPro from the Potyviridae family: an enviable multitasking Helper  
710 Component that every virus would like to have. *Mol. Plant Pathol.* **19**, 744–763.
- 711 **Vlot, A.C., Dempsey, D.A. and Klessig, D.F.** (2009) Salicylic acid, a multifaceted  
712 hormone to combat disease. *Annu. Rev. Phytopathol.* **47**, 177–206.
- 713 **Waltermann, A. and Maiss, E.** (2006) Detection of 6K1 as a mature protein of 6  
714 kDa in plum pox virus-infected *Nicotiana benthamiana*. *J. Gen. Virol.* **87**, 2381–  
715 2386.
- 716 **Wang, M.B., Masuta, C., Smith, N.A. and Shimura, H.** (2012) RNA silencing and  
717 plant viral diseases. *Mol. Plant-Microbe Interact.* **25**, 1275–1285.
- 718 **Yang, M., Zhang, Y., Xie, X., et al.** (2018) Barley stripe mosaic virus  $\gamma$  b Protein  
719 Subverts Autophagy to Promote Viral Infection by Disrupting the ATG7-ATG8  
720 Interaction. *Plant Cell* **30**, 1582–1595.
- 721 **Zhong, S., Joung, J.G., Zheng, Y., Chen, Y.R., Liu, B., Shao, Y., Xiang, J.Z., Fei,**  
722 **Z. and Giovannoni, J.J.** (2011) High-throughput illumina strand-specific RNA  
723 sequencing library preparation. *Cold Spring Harb. Protoc.* **6**, 940–949.
- 724 **Zhu-Salzman, K. and Zeng, R.** (2015) Insect response to plant defensive protease

725 inhibitors. *Annu. Rev. Entomol.* **60**, 233–252.

726

727

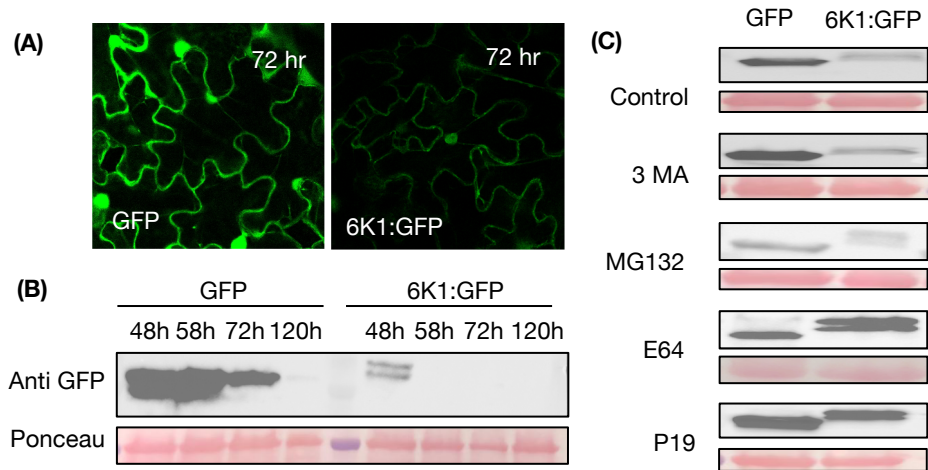

**Fig. 1 The ectopically expressed 6K1 protein is degraded by cysteine proteases.**

The construct GFP and 6K1:GFP were agroinfiltrated in *N. benthamiana* leaves. (A) Pictures were taken using a confocal laser scanning microscope with a 40X objective (images are a single section of 1- $\mu$ m thickness). The green fluorescence indicates the protein accumulation of GFP and 6K1:GFP 72 hr post agroinfiltration in a *Nicotiana benthamiana* leaf. (B) Western blots were performed with proteins extracted from the agroinfiltrated leaves collected overtime. (C) Western blot analysis of transiently expressed GFP and 6K1:GFP was assessed in the presence of chemical inhibitors of the autophagy protein degradation pathway (3MA), the proteasome protein degradation pathway (MG132), cysteine proteases (E64), and P19, an RNA interference silencing suppressor. Constructs were co-agroinfiltrated, while chemical inhibitors were infiltrated 48 hours after agroinfiltrations. For each sample, an equal volume was loaded into each well of an SDS-PAGE gel. Anti-GFP was used in both western blots and Ponceau staining was performed to check for loading control. All western blots are representative of at least two replicates which contained 3 plants per treatment (N=3).

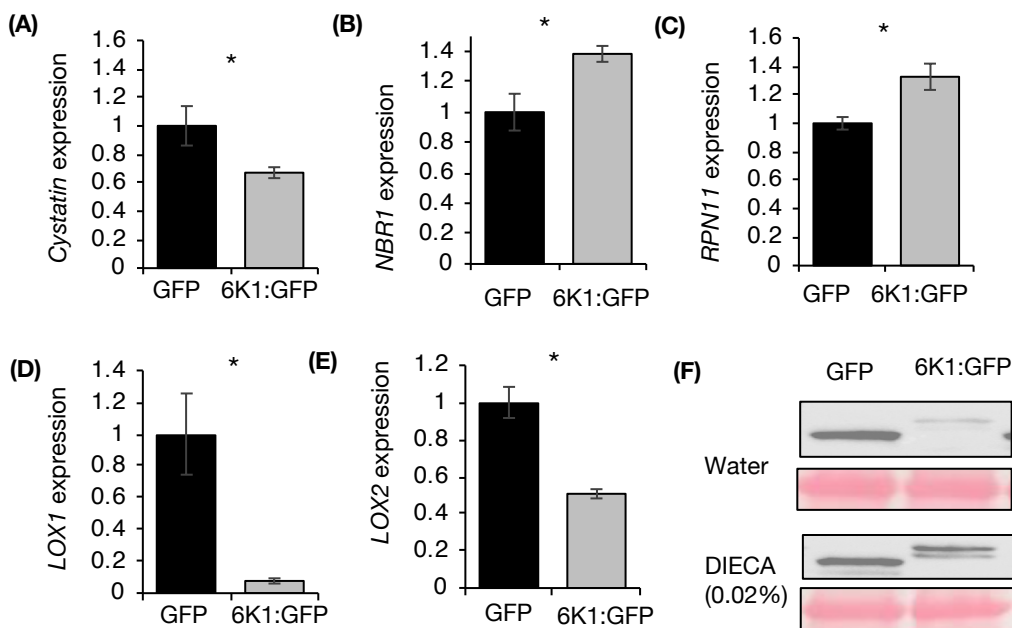

**Fig. 2 6K1 expression inhibits transcripts related to protease inhibitors and jasmonic acid accumulation.**

RNA was extracted from *Nicotiana benthamiana* leaves transiently expressing the GFP or 6K1:GFP. Transcript abundance of markers for different protein degradation pathways were measured using qRT-PCR: (A) *Cystatin*, a protease inhibitor, (B) *NBR1*, related to autophagy, and (C) *RPN11*, related to proteasome degradation. We next measured the transcript abundance of (D) *LOX1* and (E) *LOX2*, related to jasmonic acid biosynthesis. The relative quantification was performed by using *actin* as reference gene and GFP treatment as the calibrator. Each result is the mean from 5 replicated plants  $\pm$  SE. The stars denotes if the mean differences were significantly different at  $P < 0.05$  as determined from either *t*-test or, Kruskal-Wallis test. (F) The GFP or 6K1:GFP constructs were agroinfiltrated in *N. benthamiana* leaves and a lipoxygenase inhibitor (DIECA) was sprayed on half the plants 48 hr later. At 60 hr post-agroinoculation proteins were extracted and SDS-PAGE gels were run with equal volume (9 $\mu$ l) of each samples. Anti-GFP was used in both western blots and Ponceau staining was performed to check for loading control. The western blot is representative of at least two replicates which contained 3 plants per treatment (N=3).



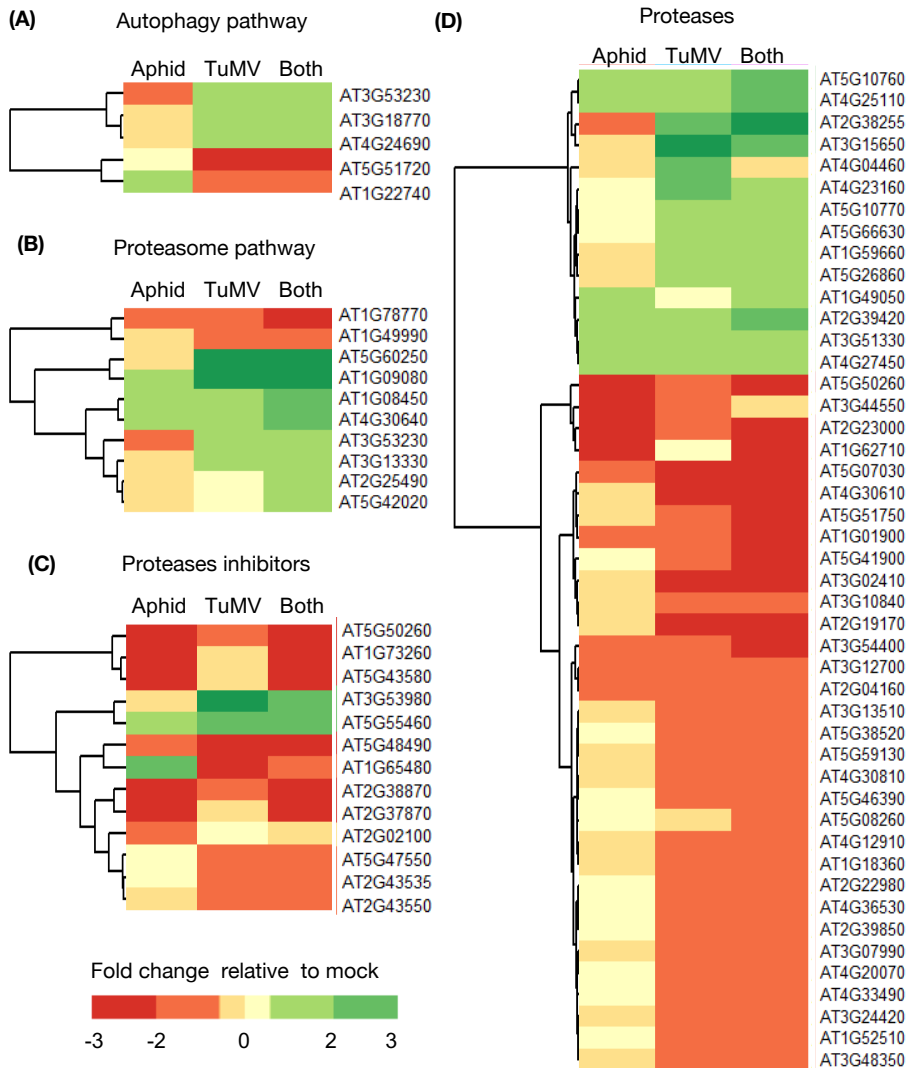

**Fig. 3 TuMV infection and aphid feeding significantly impact protein degradation pathways in *Arabidopsis thaliana*.**

RNA-seq was performed with mock-inoculated *A. thaliana*, *A. thaliana* one week after TuMV infection (TuMV), *A. thaliana* 48 hr after infestation with the *Myzus persicae* aphid (Aphid), a vector of TuMV, or from plants with both treatments (Both). Each sample represented a pool of two plants and three samples were taken per treatment (N = 3, 6 plants total). Heatmaps show genes that were at least 1.5 times differentially expressed relative to mock ( $P$ -value < 0.1). Differentially expressed genes were grouped according to the following protein degradation pathways: Autophagy (A), Proteasome (B), Protease inhibitors (C) and, Proteases (D).

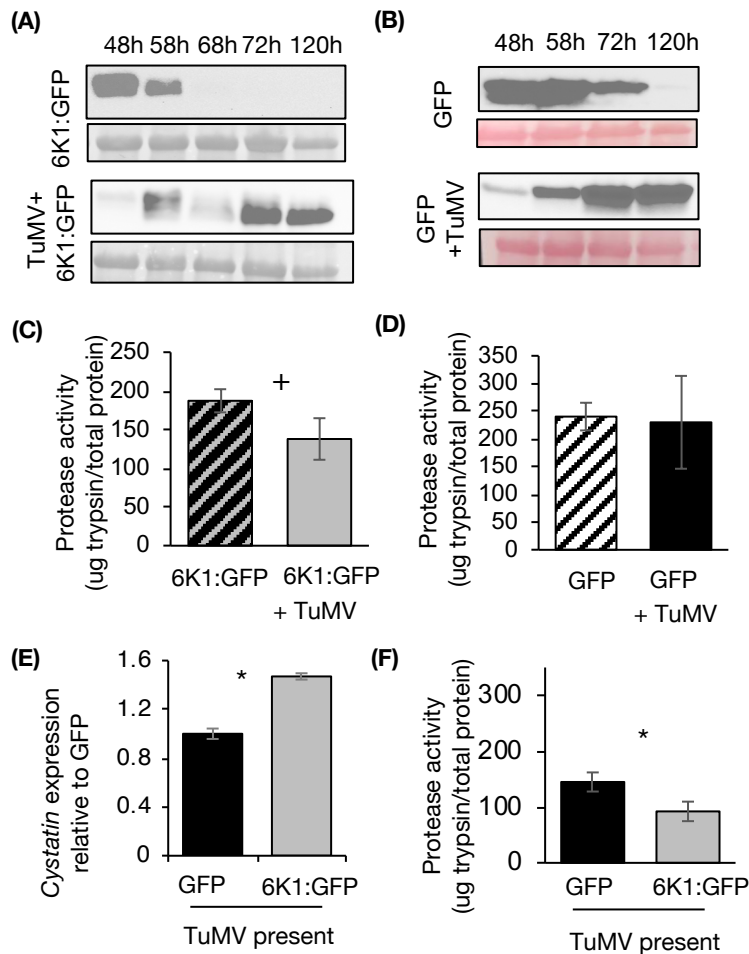

**Fig. 4 6K1:GFP protein stability increases and protease activity decreases during TuMV infection.**

Western blots were performed with *Nicotiana benthamiana* leaves expressing (A) 6K1:GFP or (B) GFP with and without TuMV over time. For each sample, an equal volume (10 $\mu$ l) was loaded into each well of an SDS-PAGE gel. Anti-GFP was used in both western blots and Ponceau staining was performed as to check for loading control. *N. benthamiana* leaves were agro-inoculated with TuMV and 5 days later (C) 6K1:GFP or (D) GFP constructs were agro-inoculated into the same leaves or into healthy control plants. Tissue was collected 60 hr later and protease activity was quantified. (E) Relative expression of *Cystatin* transcripts and (F) total protease activity were quantified in *N. benthamiana* leaves co-agro-inoculated with the GFP or 6K1:GFP protein and TuMV 60hr post agroinfiltration. Each result is mean from five biological replicates in (B), from 6-12 biological replicates in (C,D,E,F) and a t-test was used in (B,C,D,E,F) to check for significance at a *P-value* of \* < 0.05 and + < 0.1. All western blots are representative of at least two replicates which contained 3 plants per treatment (N=3).

**(A)**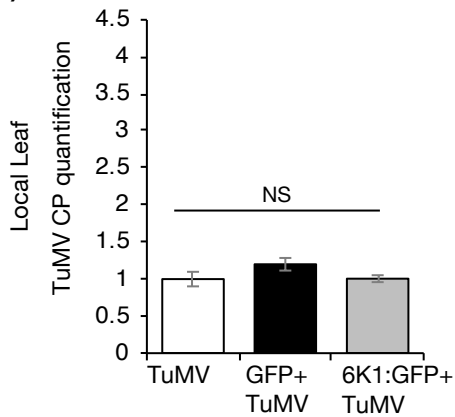**(B)**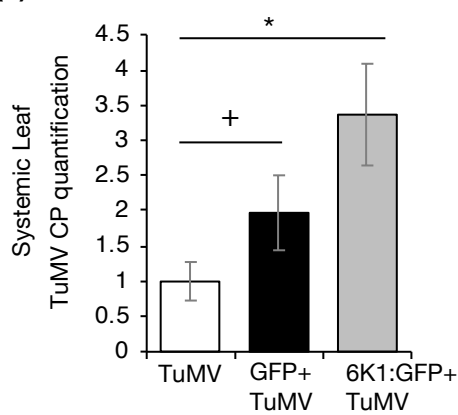

**Fig. 5 TuMV accumulation is increased in systemic leaves in the presence of the ectopically expressed 6K1:GFP**

GFP or, 6K1:GFP constructs were co-infiltrated with TuMV into *N. benthamiana* leaves. In control treatment, only TuMV was agro-infiltrated. At 60 hr post infiltrations, coat protein specific primers were used for quantification of viral RNA relative to the actin in the local and systemic leaves. Significance was determined using differences at a *P*-value of \* < 0.05 and + < 0.1 as determined from a *least significance difference* (LSD) test ( $n = 5$ , mean  $\pm$  SE).

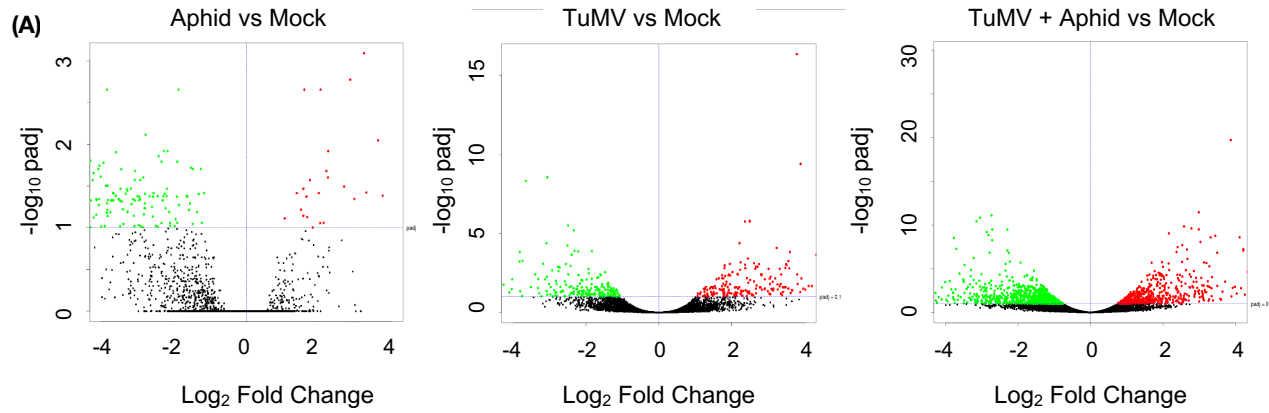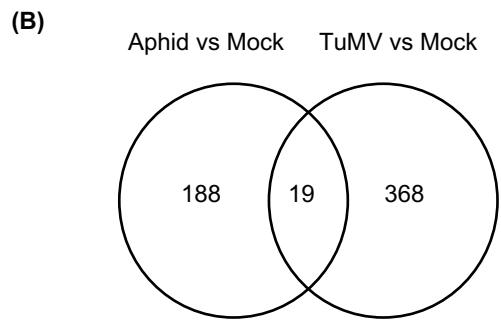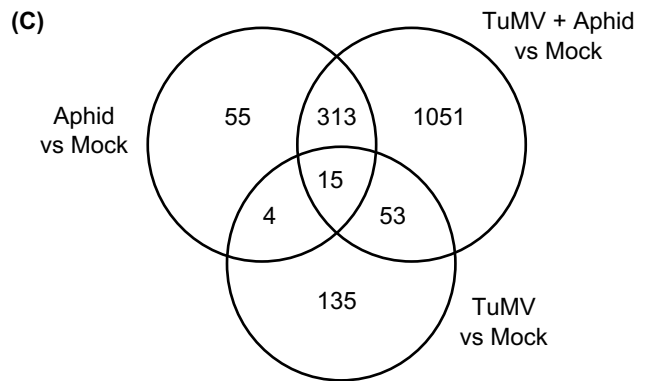

**Fig. S1.** (A) Volcano-plots of  $-\log_{10}p$  and  $\log_2FC$  exhibited by each gene in *Arabidopsis thaliana* with aphids, TuMV, or both aphids and TuMV, compared to mock controls. Up- and down-regulated genes are presented in red and green, respectively. (B) Numbers of differentially expressed genes (DEGs) shared between aphid-infested and TuMV-infected *A. thaliana* compared to mock controls. (C) Numbers of differentially expressed genes (DEGs) shared among all three treatments compared to mock controls. DEGs were identified using DESeq2 and defined by  $|\log_2FC| \geq 1$ ; false discovery rate (FDR)-corrected p-value  $\leq 0.1$ . FC, fold-change; p, FDR-corrected p-value.

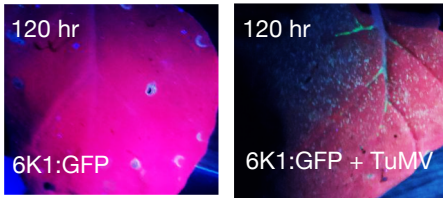

**Fig. S4** The construct 6K1:GFP was co-infiltrated with or without TuMV. Pictures were taken under a UV lamp of the agro-infiltrated leaves 120 hr later. The green fluorescence indicates the protein accumulation of 6K1:GFP.

| <b>Gene</b> | <b>Amplicon</b> | <b>Tm</b> | <b>Sequence (5' - 3')</b>     |
|-------------|-----------------|-----------|-------------------------------|
| Actin2F     | 108             | 58.2      | GGTAACATTGTGCTCAGTGGTGG       |
| Actin2R     | 108             | 55.7      | AACGACCTTAATCTTCATGCTGC       |
| NBR1F       | 152             | 58.4      | CATTTTCTGGGGTGCCAAACGA        |
| NBR1R       | 152             | 58.3      | GAACCTAGGGCCAGTTATCGGA        |
| cystatinF   | 157             | 57.9      | CTC GCT TTG CTG TCG ATG AAC A |
| cystatinR   | 157             | 56.8      | ACC TTG GCT TCG TAT GCT TTC T |
| Rpn11F      | 153             | 57.5      | AAA GCA GTG CAG GAA GAG GAT G |
| Rpn11R      | 153             | 57.9      | AAC TGT GTC AAG CAT GGT TCC C |
| lox(1)F     | 160             | 57.6      | CTT TTG TGG GTT GTT GCT GCT G |
| lox(1)R     | 160             | 57.8      | CTA AAA CTG CTC CAA CCT CCC C |
| lox(2)F     | 167             | 57.7      | GGG GAT GCA GAG ATT GTC GAA G |
| lox(2)R     | 167             | 57.8      | CAT GTT ACT CCA GGG CCA GAA C |
| TumvCpF     | 117             | 57.8      | CAT TGA GAA CGG AAC CTC CCC   |
| TumvCpR     | 117             | 58.6      | TGC CTA AAT GTG GGT TTG GCG   |

Table S4. A list of primers used for quantification.
